# Supplementary material for: Quantifying Balance Billing for Out-of-Network Behavioral Health Care in Employer-Sponsored Insurance
Source: Atypon-hosted journal article supplement (doi:10.1176/appi.ps.202100157), 2022-03-23
Supplement: appi.ps.202100157.ds001.pdf [file appi.ps.202100157.ds001.pdf]

## Web Appendix

Web Appendix Figure 1. Creation of the full and SES sample of family-years

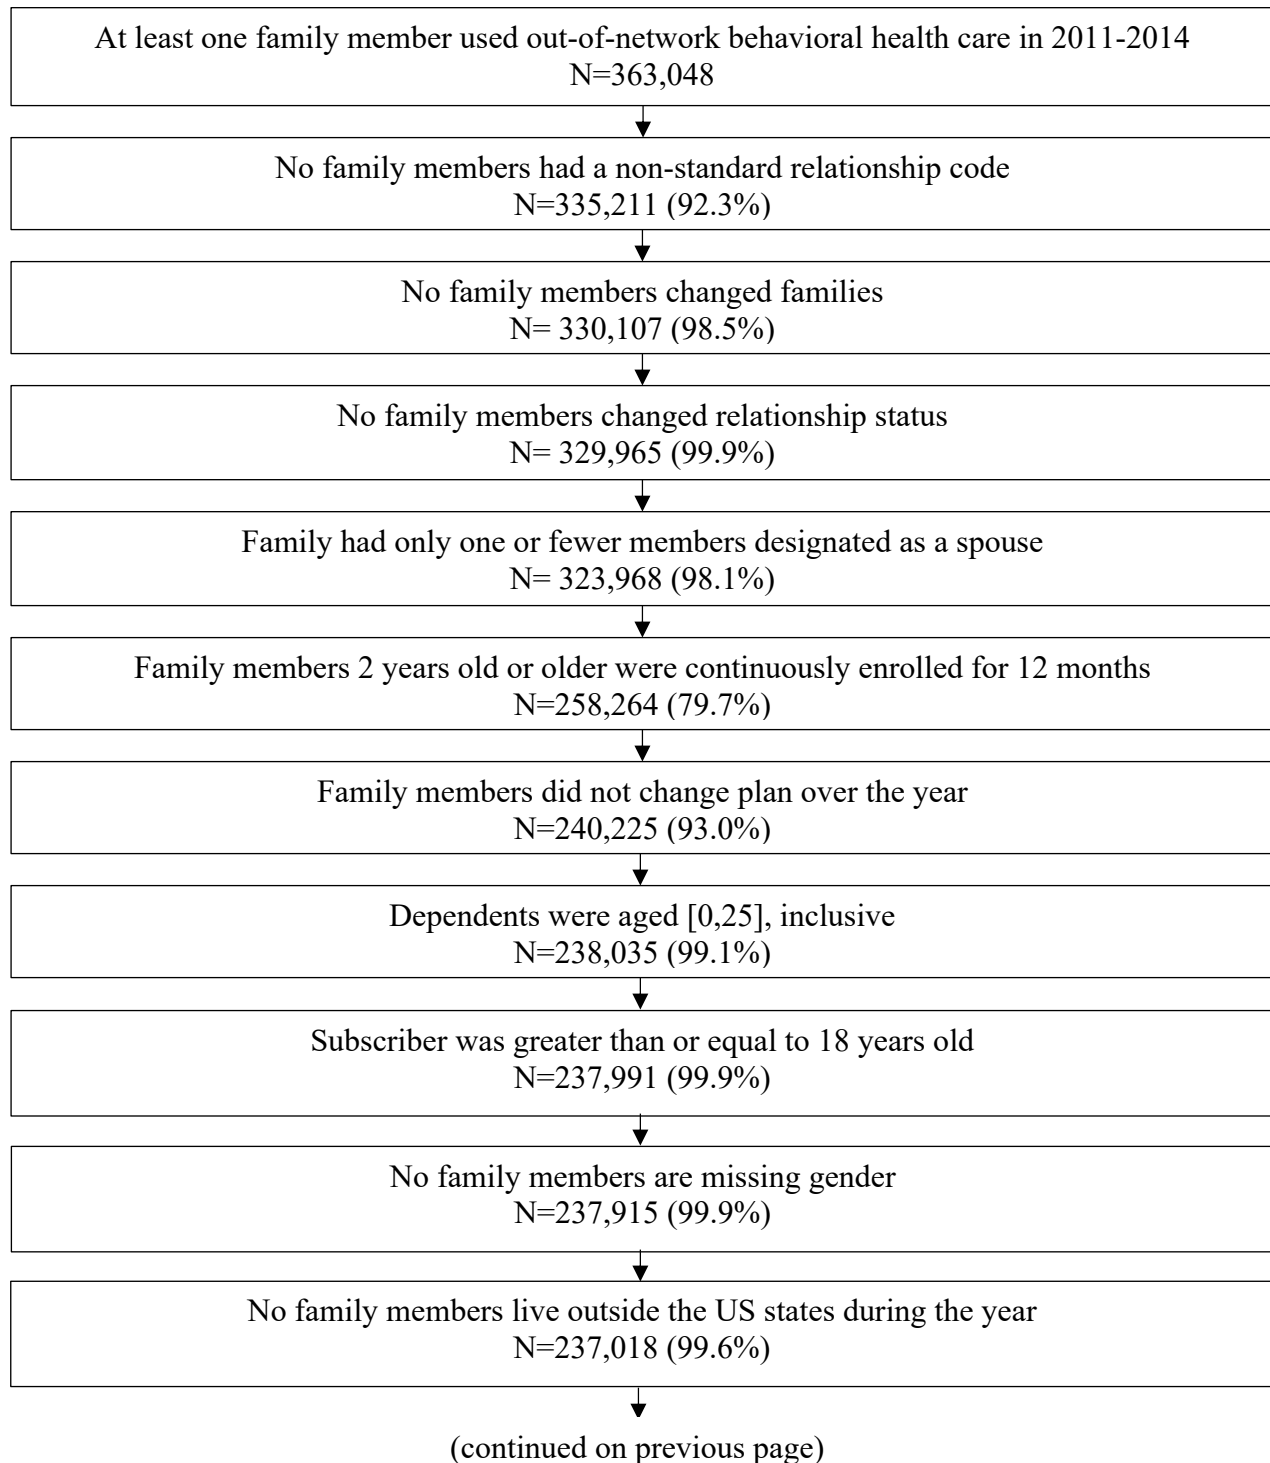

(continued from previous page)

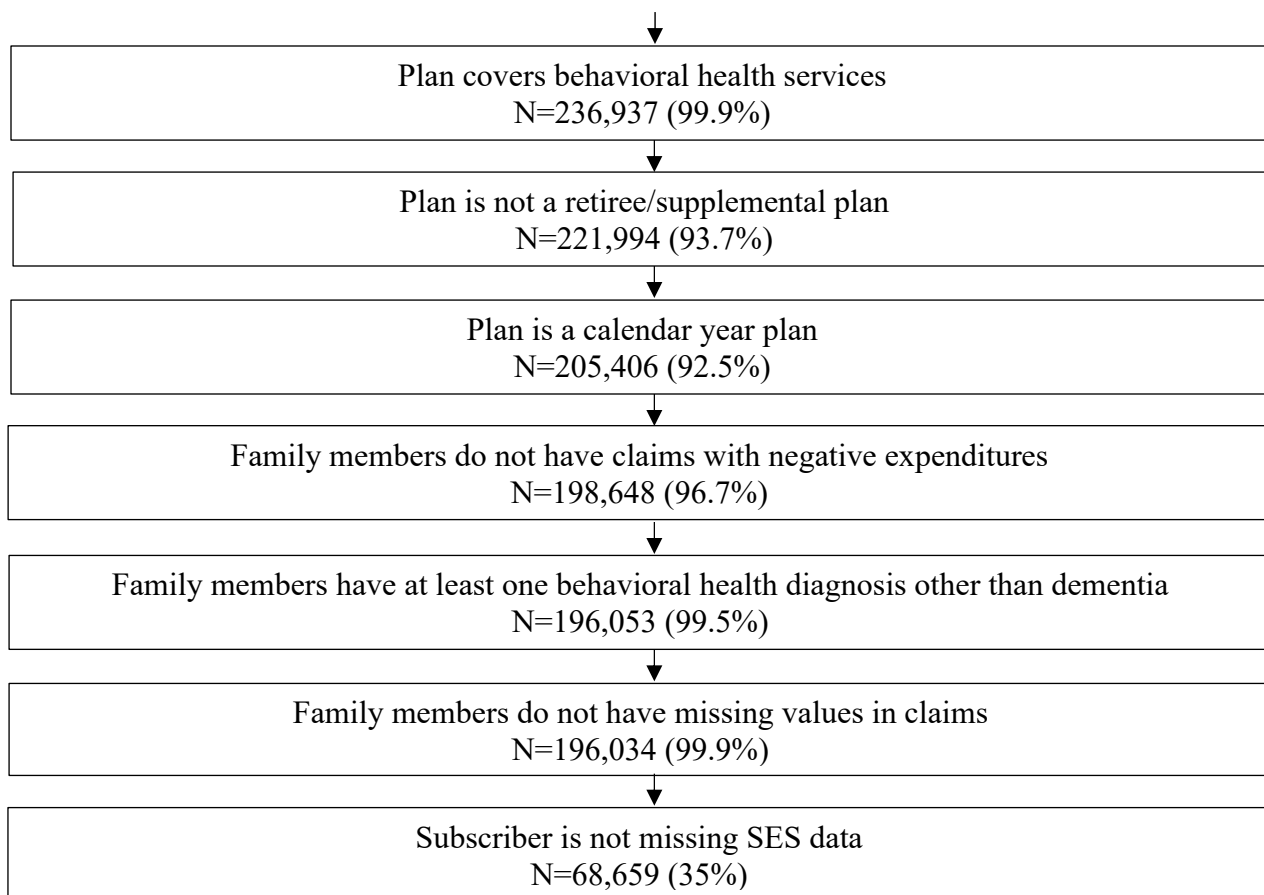

Web Appendix Table 2. Summary of balance billing<sup>a</sup> in the SES sample

|                                                                                     | Mean  | SD     | Median | 75th percentile | 90 <sup>th</sup> percentile |
|-------------------------------------------------------------------------------------|-------|--------|--------|-----------------|-----------------------------|
| <b>Among all family-years (n=68,659)</b>                                            |       |        |        |                 |                             |
| Total Balance billing for family-year                                               | \$423 | \$2762 | \$0    | \$143           | \$720                       |
| Balance billing per member in family-year                                           | \$187 | \$1247 | \$0    | \$51            | \$286                       |
| Balance billing as a proportion of family out-of-network out-of-pocket expenditures | 15%   | 23%    | 0%     | 24%             | 50%                         |
| <b>Among family-years with any balance billing (n=32,777)</b>                       |       |        |        |                 |                             |
| Total Balance billing for family-year                                               | \$886 | \$3946 | \$159  | \$569           | \$1668                      |
| Balance billing per member in family-year                                           | \$391 | \$1783 | \$58   | \$218           | \$734                       |
| Balance billing as a proportion of family out-of-network out-of-pocket expenditures | 30%   | 26%    | 24%    | 43%             | 66%                         |

SD: Standard Deviation

a: Dollar amounts were adjusted for inflation to 2014 values.

Web Appendix Table 3. Differences in balance billing by member in family-year, by subscriber and family characteristics (n=68,659)

|                                                                                              | Balance billing by member in family-year <sup>a,b</sup> |              |
|----------------------------------------------------------------------------------------------|---------------------------------------------------------|--------------|
|                                                                                              | Marginal effect (\$)                                    | 95% CI       |
| <b>Plan characteristics</b>                                                                  |                                                         |              |
| Carve-out status (versus Carve-in)                                                           | 244*                                                    | (162, 327)   |
| HMO (versus non-HMO)                                                                         | 73*                                                     | (38, 108)    |
| <b>Provider supply</b>                                                                       |                                                         |              |
| Short-term hospital beds per 10K people                                                      | 3*                                                      | (0.1, 6)     |
| Psychiatric hospitals per 10K people                                                         | -407                                                    | (-1357, 544) |
| In-network behavioral health providers (MD, PhD, MSW, RN) per 10K people                     | -3*                                                     | (-4, -2)     |
| <b>Subscriber highest level of educational attainment (ref= Bachelor's degree or higher)</b> |                                                         |              |
| High school or lower                                                                         | -99*                                                    | (-125, -72)  |
| Some college                                                                                 | -84*                                                    | (-105, -62)  |
| Associates degree                                                                            | -76*                                                    | (-100, -51)  |
| <b>Subscriber income and net worth (ref= Income: &lt;75K &amp; net worth: &lt;= 25K)</b>     |                                                         |              |
| Income: <75K & net worth: 25K-100K                                                           | -16                                                     | (-59, 27)    |
| Income: < 75K & net worth: >=100K                                                            | 7                                                       | (-34, 48)    |
| Income: 75K-150K & net worth: <100K                                                          | -12                                                     | (-53, 29)    |
| Income: 75K-150K & net worth: 100K-250K                                                      | -23                                                     | (-60, 15)    |
| Income: 75K-150K & net worth: >250K                                                          | -26                                                     | (-61, 10)    |
| Income: >150K & net worth: < 500K                                                            | -8                                                      | (-46, 30)    |
| Income: >150K & net worth: >= 500K                                                           | 2                                                       | (-35, 40)    |
| <b>Subscriber race-ethnicity and language (ref=white, any language)</b>                      |                                                         |              |
| Asian, English                                                                               | -2                                                      | (-55, 52)    |
| Asian, other language                                                                        | 22                                                      | (-49, 93)    |
| Black, any language                                                                          | -.1                                                     | (-36, 35)    |
| Hispanic, English                                                                            | -7                                                      | (-102, 74)   |
| Hispanic, other language                                                                     | 31                                                      | (-18, 81)    |
| Other, any language                                                                          | 7                                                       | (-26, 40)    |
| <b>Subscriber age (ref=45-54 years old)</b>                                                  |                                                         |              |
| 18-24                                                                                        | -110*                                                   | (-163, -56)  |
| 25-34                                                                                        | -49*                                                    | (-73, -25)   |
| 35-44                                                                                        | -18                                                     | (-39, 2)     |
| 55-64                                                                                        | -7                                                      | (-30, 16)    |
| 65+                                                                                          | -25                                                     | (-76, 26)    |
| <b>Subscriber relationship (ref=single)</b>                                                  |                                                         |              |
| Domestic partner, different gender                                                           | -135*                                                   | (-185, -85)  |
| Domestic partner, same gender                                                                | -73                                                     | (-154, 7)    |
| Spouse, different gender                                                                     | -122*                                                   | (-144, -101) |
| Spouse, same gender                                                                          | -176*                                                   | (-257, -95)  |
| <b>Number of dependents (ref=0)</b>                                                          |                                                         |              |
| 1                                                                                            | -51*                                                    | (-66, -35)   |
| 2                                                                                            | -52*                                                    | (-64, -40)   |

|                                          | Balance billing by member in family-year <sup>a,b</sup> |            |
|------------------------------------------|---------------------------------------------------------|------------|
|                                          | Marginal effect (\$)                                    | 95% CI     |
| 3                                        | -61*                                                    | (-72, -50) |
| 4+                                       | -71*                                                    | (-83, -59) |
| <b>Diagnosis-type/s in family</b>        |                                                         |            |
| Adjustment disorder                      | 18*                                                     | (2, 35)    |
| PTSD                                     | 56*                                                     | (17, 95)   |
| Generalized anxiety disorder             | 53*                                                     | (37, 70)   |
| Obsessive compulsive disorder            | 66*                                                     | (20, 111)  |
| Panic disorder                           | -23                                                     | (-52, 7)   |
| Phobia disorders                         | 73*                                                     | (24, 123)  |
| Attention deficit hyperactivity disorder | -10                                                     | (-48, 28)  |
| Other child behavioral health disorders  | 15                                                      | (-24, 54)  |
| Pervasive developmental disorder         | 288*                                                    | (197, 379) |
| Bipolar disorder                         | 28*                                                     | (9, 47)    |
| Depression                               | 40*                                                     | (24, 56)   |
| Personality disorder                     | 73*                                                     | (2, 143)   |
| Schizophrenia                            | -67*                                                    | (-91, -43) |
| Alcohol use disorder                     | 201*                                                    | (153, 249) |
| Drug use disorder                        | 506*                                                    | (427, 584) |
| Other behavioral health disorders        | 45*                                                     | (23, 66)   |

\*P<0.05

a: All models also control for subscriber employer characteristics (size, industry, region, etc.) whether or not plans are an HMO, unknown income and net worth < \$150K and unknown income and net worth >= 150K, and calendar years. Marginal effects are generated using the margins command in STATA.

b: Models used a two-part model for total family-year balance billing. Part 1 of the two-part model uses logit to determine the probability of having any balance billing. Part 2 of the two-part model uses a gamma regression to determine the average change in balance-billing level among those with any balance billing. The results reported here combined parts 1 and 2 to report the change in balance-billing level among the full sample, unconditional on whether they had any balance billing.

Web Appendix Table 4. Differences in adjusted balance billing by subscriber and family characteristics, sensitivity analysis controlling for whether diagnoses occurred alone or together with other behavioral health diagnoses, (n=68,659)

|                                                                                              | Total family-year balance billing <sup>a,b</sup> |               |
|----------------------------------------------------------------------------------------------|--------------------------------------------------|---------------|
|                                                                                              | Marginal effect (\$)                             | 95% CI        |
| <b>Plan characteristics</b>                                                                  |                                                  |               |
| Carve-out status (versus Carve-in)                                                           | 407*                                             | (320, 494)    |
| HMO (versus non-HMO)                                                                         | 154*                                             | (80, 229)     |
| <b>Provider supply</b>                                                                       |                                                  |               |
| Short-term hospital beds per 10K people                                                      | 7*                                               | (1, 14)       |
| Psychiatric hospitals per 10K people                                                         | -719                                             | (-2708, 1270) |
| In-network behavioral health providers (MD, PhD, MSW, RN) per 10K people                     | -7*                                              | (-10, -5)     |
| <b>Subscriber highest level of educational attainment (ref= Bachelor's degree or higher)</b> |                                                  |               |
| High school or lower                                                                         | -223*                                            | (-284, -162)  |
| Some college                                                                                 | -182*                                            | (-225, -140)  |
| Associates degree                                                                            | -166*                                            | (-218, -113)  |
| <b>Subscriber income and net worth (ref= Income: &lt;75K &amp; net worth: &lt;= 25K)</b>     |                                                  |               |
| Income: <75K & net worth: 25K-100K                                                           | -15                                              | (-105, 75)    |
| Income: < 75K & net worth: >=100K                                                            | 27                                               | (-55, 109)    |
| Income: 75K-150K & net worth: <100K                                                          | 18                                               | (-67, 103)    |
| Income: 75K-150K & net worth: 100K-250K                                                      | -29                                              | (-108, 50)    |
| Income: 75K-150K & net worth: >250K                                                          | -36                                              | (-110, 38)    |
| Income: >150K & net worth: < 500K                                                            | 15                                               | (-63, 93)     |
| Income: >150K & net worth: >= 500K                                                           | 37                                               | (-38, 113)    |
| <b>Subscriber race-ethnicity and language (ref=white, any language)</b>                      |                                                  |               |
| Asian, English                                                                               | 7                                                | (-107, 121)   |
| Asian, other language                                                                        | 43                                               | (-91, 178)    |
| Black, any language                                                                          | 14                                               | (-60, 89)     |
| Hispanic, English                                                                            | -1                                               | (-85, 83)     |
| Hispanic, other language                                                                     | 76*                                              | (-14, 166)    |
| Other, any language                                                                          | 18                                               | (-49, 86)     |
| <b>Subscriber age (ref=45-54 years old)</b>                                                  |                                                  |               |
| 18-24                                                                                        | -364*                                            | (-563, -165)  |
| 25-34                                                                                        | -146*                                            | (-202, -91)   |
| 35-44                                                                                        | -50*                                             | (-91, -9)     |
| 55-64                                                                                        | -29                                              | (-74, 15)     |
| 65+                                                                                          | -60                                              | (-169, 49)    |
| <b>Subscriber relationship (ref=single)</b>                                                  |                                                  |               |
| Domestic partner, different gender                                                           | -47                                              | (-191, 96)    |
| Domestic partner, same gender                                                                | 73                                               | (-96, 242)    |
| Spouse, different gender                                                                     | -24                                              | (-61, 13)     |
| Spouse, same gender                                                                          | -212                                             | (-547, 122)   |
| <b>Number of dependents (ref=0)</b>                                                          |                                                  |               |
| 1                                                                                            | 33*                                              | (0.5, 65)     |
| 2                                                                                            | 17                                               | (-8, 41)      |
| 3                                                                                            | -6                                               | (-28, 16)     |

|                                                                           | Total family-year balance billing <sup>a,b</sup> |             |
|---------------------------------------------------------------------------|--------------------------------------------------|-------------|
|                                                                           | Marginal effect (\$)                             | 95% CI      |
| 4+                                                                        | -28*                                             | (-51, -5)   |
| <b>Diagnosis</b>                                                          |                                                  |             |
| Adjustment disorder only                                                  | -139*                                            | (-203, -75) |
| Adjustment disorder and at least one other diagnosis                      | 71*                                              | (30, 111)   |
| PTSD only                                                                 | -276                                             | (-817, 265) |
| PTSD and at least one other diagnosis                                     | 71*                                              | (3, 140)    |
| Generalized anxiety disorder only                                         | -49                                              | (-122, 224) |
| Generalized anxiety disorder and at least one other diagnosis             | 109*                                             | (70, 148)   |
| Obsessive compulsive disorder only                                        | -5                                               | (-206, 196) |
| Obsessive compulsive disorder and at least one other diagnosis            | 116*                                             | (37, 194)   |
| Panic disorder only                                                       | -                                                | -           |
| Panic disorder and at least one other diagnosis                           | -87*                                             | (-157, -17) |
| Phobia disorders only                                                     | -117                                             | (-418, 183) |
| Phobia disorders and at least one other diagnosis                         | 117*                                             | (37, 198)   |
| Attention deficit hyperactivity disorder only                             | -                                                | -           |
| Attention deficit hyperactivity disorder and at least one other diagnosis | -69                                              | (-159, 22)  |
| Other child behavioral health disorders only                              | -210*                                            | (-383, -38) |
| Other child behavioral health disorders and at least one other diagnosis  | 52                                               | (-36, 140)  |
| Pervasive developmental disorder only                                     | 528*                                             | (348, 708)  |
| Pervasive developmental disorder and at least one other diagnosis         | 305*                                             | (215, 395)  |
| Bipolar disorder only                                                     | -206*                                            | (-345, -67) |
| Bipolar disorder and at least one other diagnosis                         | 50*                                              | (9, 91)     |
| Depression only                                                           | -28                                              | (-102, 47)  |
| Depression and at least one other diagnosis                               | 39                                               | (-2, 81)    |
| Personality disorder only                                                 | -26                                              | (-789, 737) |
| Personality disorder and at least one other diagnosis                     | 120*                                             | (9, 231)    |
| Schizophrenia only                                                        | -318*                                            | (-582, -53) |
| Schizophrenia and at least one other diagnosis                            | -160*                                            | (-232, -88) |
| Alcohol use disorder only                                                 | 811*                                             | (618, 1003) |
| Alcohol use disorder and at least one other diagnosis                     | 240*                                             | (169, 310)  |
| Drug use disorder only                                                    | 1040*                                            | (863, 1217) |
| Drug use disorder and at least one other diagnosis                        | 649*                                             | (568, 729)  |
| Other behavioral health disorders only                                    | -182*                                            | (-302, -62) |
| Other behavioral health disorders and at least one other diagnosis        | 111*                                             | (68, 156)   |

a: All models also control for subscriber employer characteristics (size, industry, region, etc.), unknown income and net worth < \$150K and unknown income and net worth >= 150K and calendar years. Marginal effects are generated using the margins command in STATA.

b: Models used a two-part model for total family-year balance billing. Part 1 of the two-part model uses logit to determine the probability of having any balance billing. Part 2 of the two-part model uses a gamma regression to determine the average change in balance-billing level among those with any balance billing. The results reported here combined parts 1 and 2 to report the change in balance-billing level among the full sample, unconditional on whether they had any balance billing.

Web Appendix Table 5a. Summary of balance billing<sup>a</sup> in full sample using trimmed balance-balance billing values

|                                                                                     | Mean (SD)      | Median | 75th percentile | 90 <sup>th</sup> percentile |
|-------------------------------------------------------------------------------------|----------------|--------|-----------------|-----------------------------|
| <b>Among all family-years (n=190,072)</b>                                           |                |        |                 |                             |
| Total balance billing for family-year                                               | \$363 (\$1934) | \$0    | \$155           | \$692                       |
| Balance billing per member in family-year                                           | \$165 (\$945)  | \$0    | \$57            | \$283                       |
| Balance billing as a proportion of family out-of-network out-of-pocket expenditures | 17% (25%)      | 0%     | 28%             | 54%                         |
| <b>Among family-years with balance billing (n=93,222)</b>                           |                |        |                 |                             |
| Total balance billing for family-year                                               | \$741 (\$2710) | \$161  | \$530           | \$1472                      |
| Balance billing per member in family-year                                           | \$337 (\$1329) | \$60   | \$212           | \$669                       |
| Balance billing as a proportion of family out-of-network out-of-pocket expenditures | 32% (26%)      | 27%    | 48%             | 69%                         |

SD: Standard Deviation

a: Dollar amounts were adjusted for inflation to 2014 values.

Web Appendix Table 5b. Summary of balance billing<sup>b</sup> in the SES sample using trimmed balance billing values

|                                                                                     | Mean (SD)      | Median | 75th percentile | 90 <sup>th</sup> percentile |
|-------------------------------------------------------------------------------------|----------------|--------|-----------------|-----------------------------|
| <b>Among all family-years (n=66,648)</b>                                            |                |        |                 |                             |
| Total balance billing for family-year                                               | \$350 (\$1986) | \$0    | \$125           | \$615                       |
| Balance billing per member in family-year                                           | \$157 (\$901)  | \$0    | \$46            | \$246                       |
| Balance billing as a proportion of family out-of-network out-of-pocket expenditures | 14% (23%)      | 0%     | 22%             | 48%                         |
| <b>Among family-years with balance billing (n=31,165)</b>                           |                |        |                 |                             |
| Total balance billing for family-year                                               | \$748 (\$2852) | \$148  | \$494           | \$1436                      |
| Balance billing per member in family-year                                           | \$336 (\$1294) | \$53   | \$195           | \$654                       |
| Balance billing as a proportion of family out-of-network out-of-pocket expenditures | 30% (25%)      | 23%    | 42%             | 65%                         |

SD: Standard Deviation

b: Dollar amounts were adjusted for inflation to 2014 values.



Web Appendix Table 6. Adjusted differences in probability of any balance billing, and differences in level of total balance billing among those with any balance billing and among all family-years, by plan characteristics, provider supply, and subscriber and family characteristics, using trimmed balance billing values (n=66,648)

|                                                                                              | Difference in the probability of any balance billing (n=66,648) <sup>a,b</sup> |              | Difference in the level of balance billing among family-years with any balance billing <sup>a,c</sup> (n=31,165) |               | Difference in level of balance billing among all family-years <sup>a,d</sup> (n=66,648) |               |
|----------------------------------------------------------------------------------------------|--------------------------------------------------------------------------------|--------------|------------------------------------------------------------------------------------------------------------------|---------------|-----------------------------------------------------------------------------------------|---------------|
|                                                                                              | Percentage points                                                              | 95% CI       | \$                                                                                                               | 95% CI        | \$                                                                                      | 95% CI        |
| <b>Plan characteristics</b>                                                                  |                                                                                |              |                                                                                                                  |               |                                                                                         |               |
| Carve-out status (versus Carve-in)                                                           | 28*                                                                            | (26, 29)     | 426*                                                                                                             | (238, 614)    | 494*                                                                                    | (361, 626)    |
| HMO (versus non-HMO)                                                                         | 15*                                                                            | (13, 17)     | 78                                                                                                               | (-36, 192)    | 151*                                                                                    | (96, 206)     |
| <b>Provider supply</b>                                                                       |                                                                                |              |                                                                                                                  |               |                                                                                         |               |
| Short-term hospital beds per 10K people                                                      | -0.003                                                                         | (-0.2, 0.1)  | 9                                                                                                                | (-1, 19)      | 4                                                                                       | (-1, 9)       |
| Psychiatric hospitals per 10K people                                                         | 7                                                                              | (-41, 55)    | 98                                                                                                               | (-2977, 3174) | -98                                                                                     | (-1387, 1583) |
| In-network behavioral health providers (MD, PhD, MSW, RN) per 10K people                     | 0.03                                                                           | (-0.04, 0.1) | -11*                                                                                                             | (-15, -8)     | -5*                                                                                     | (-7, -3)      |
| <b>Subscriber highest level of educational attainment (ref= Bachelor's degree or higher)</b> |                                                                                |              |                                                                                                                  |               |                                                                                         |               |
| High school or lower                                                                         | -4*                                                                            | (-6, -3)     | -249*                                                                                                            | (-337, -162)  | -149*                                                                                   | (-191, -107)  |
| Some college                                                                                 | -4*                                                                            | (-5, -3)     | -200*                                                                                                            | (-268, -133)  | -127*                                                                                   | (-160, -93)   |
| Associates degree                                                                            | -3*                                                                            | (-5, -2)     | -180*                                                                                                            | (-260, -99)   | -111*                                                                                   | (-150, -72)   |
| <b>Subscriber income and net worth (ref= Income: &lt;75K &amp; net worth: &lt;= 25K)</b>     |                                                                                |              |                                                                                                                  |               |                                                                                         |               |
| Income: <75K & net worth: 25K-100K                                                           | -2                                                                             | (-4, 0.5)    | 10                                                                                                               | (-123, 143)   | -7                                                                                      | (-71, 57)     |
| Income: < 75K & net worth: >=100K                                                            | -1                                                                             | (-3, 0.7)    | 31                                                                                                               | (-91, 153)    | 6                                                                                       | (-53, 65)     |
| Income: 75K-150K & net worth: <100K                                                          | -4*                                                                            | (-6, -2)     | 101                                                                                                              | (-32, 234)    | 16                                                                                      | (-47, 78)     |
| Income: 75K-150K & net worth: 100K-250K                                                      | -2                                                                             | (-4, 0.3)    | 26                                                                                                               | (-92, 145)    | 1                                                                                       | (-56, 58)     |
| Income: 75K-150K & net worth: >250K                                                          | -2                                                                             | (-3, 0.2)    | 22                                                                                                               | (-88, 131)    | -1                                                                                      | (-54, 52)     |
| Income: >150K & net worth: < 500K                                                            | -2                                                                             | (-4, 0.2)    | 49                                                                                                               | (-68, 166)    | 10                                                                                      | (-46, 67)     |
| Income: >150K & net worth: >= 500K                                                           | 1                                                                              | (-0.7, 3)    | 66                                                                                                               | (-49, 181)    | 41                                                                                      | (-16, 97)     |
| <b>Subscriber race-ethnicity and language (ref=white, any language)</b>                      |                                                                                |              |                                                                                                                  |               |                                                                                         |               |
| Asian, English                                                                               | -1                                                                             | (-4, 2)      | 152                                                                                                              | (-59, 364)    | 61                                                                                      | (-39, 161)    |
| Asian, other language                                                                        | -2                                                                             | (-5, 1)      | 122                                                                                                              | (-120, 363)   | 42                                                                                      | (-71, 155)    |
| Black, any language                                                                          | -1                                                                             | (-3, 4)      | -44                                                                                                              | (-151, 63)    | -30                                                                                     | (-81, 20)     |
| Hispanic, English                                                                            | -0.9                                                                           | (-3, 1)      | 41                                                                                                               | (-94, 177)    | 12                                                                                      | (-52, 77)     |
| Hispanic, other language                                                                     | -0.6                                                                           | (-3, 1)      | 194*                                                                                                             | (21, 367)     | 86                                                                                      | (3, 168)      |
| Other, any language                                                                          | 0.8                                                                            | (-1, 3)      | 36                                                                                                               | (-73, 145)    | 23                                                                                      | (-30, 77)     |
| <b>Subscriber age (ref=45-54 years old)</b>                                                  |                                                                                |              |                                                                                                                  |               |                                                                                         |               |
| 18-24                                                                                        | -3                                                                             | (-8, 1)      | -364*                                                                                                            | (-546, -181)  | -188*                                                                                   | (-272, -105)  |
| 25-34                                                                                        | -3*                                                                            | (-4, -1)     | -102*                                                                                                            | (-183, -22)   | -67*                                                                                    | (-105, -29)   |
| 35-44                                                                                        | -1                                                                             | (-2, 0.2)    | -27*                                                                                                             | (-92, 38)     | -19                                                                                     | (-50, 13)     |
| 55-64                                                                                        | -0.03                                                                          | (-1.2, 1)    | 12                                                                                                               | (-61, 86)     | 6                                                                                       | (-30, 42)     |
| 65+                                                                                          | -8*                                                                            | (-10, -6)    | 74                                                                                                               | (-118, 265)   | -34                                                                                     | (-192, 46)    |
| <b>Subscriber relationship (ref=single)</b>                                                  |                                                                                |              |                                                                                                                  |               |                                                                                         |               |

|                                          | Difference in the probability of any balance billing (n=66,648) <sup>a,b</sup> |             | Difference in the level of balance billing among family-years with any balance billing <sup>a,c</sup> (n=31,165) |              | Difference in level of balance billing among all family-years <sup>a,d</sup> (n=66,648) |             |
|------------------------------------------|--------------------------------------------------------------------------------|-------------|------------------------------------------------------------------------------------------------------------------|--------------|-----------------------------------------------------------------------------------------|-------------|
|                                          | Percentage points                                                              | 95% CI      | \$                                                                                                               | 95% CI       | \$                                                                                      | 95% CI      |
| Domestic partner, different gender       | 1                                                                              | (-2, 5)     | -52                                                                                                              | (-269, 164)  | -13                                                                                     | (-119, 93)  |
| Domestic partner, same gender            | 0.2                                                                            | (-4, 4)     | 159                                                                                                              | (-165, 482)  | 75                                                                                      | (-114, 359) |
| Spouse, different gender                 | 1*                                                                             | (0.02, 2)   | -41                                                                                                              | (-100, 17)   | -12                                                                                     | (-56, 25)   |
| Spouse, same gender                      | -4                                                                             | (-12, 4)    | -403*                                                                                                            | (-692, -114) | -203                                                                                    | (-412, 71)  |
| <b>Number of dependents (ref=0)</b>      |                                                                                |             |                                                                                                                  |              |                                                                                         |             |
| 1                                        | 1*                                                                             | (1, 2)      | -21                                                                                                              | (-72, 29)    | 0.2                                                                                     | (-24, 25)   |
| 2                                        | 2*                                                                             | (1, 2)      | 17                                                                                                               | (-22, 56)    | 20*                                                                                     | (1, 38)     |
| 3                                        | 1*                                                                             | (1, 2)      | -42*                                                                                                             | (-77, -8)    | -10                                                                                     | (-27, 6)    |
| 4+                                       | -0.1                                                                           | (-0.7, 0.4) | -24                                                                                                              | (-60, 12)    | -12                                                                                     | (-30, 5)    |
| <b>Diagnosis</b>                         |                                                                                |             |                                                                                                                  |              |                                                                                         |             |
| Adjustment disorder                      | 4*                                                                             | (3, 5)      | 36                                                                                                               | (-17, 89)    | 47*                                                                                     | (21, 73)    |
| PTSD                                     | 0.1                                                                            | (-2, 2)     | 199*                                                                                                             | (73, 325)    | 94*                                                                                     | (33, 155)   |
| Generalized anxiety disorder             | 3*                                                                             | (2, 4)      | 156*                                                                                                             | (103, 209)   | 99*                                                                                     | (72, 125)   |
| Obsessive compulsive disorder            | 7*                                                                             | (5, 9)      | 156*                                                                                                             | (18, 293)    | 137*                                                                                    | (62, 212)   |
| Panic disorder                           | -0.2                                                                           | (-2, 2)     | -166*                                                                                                            | (-255, -77)  | -79*                                                                                    | (-122, -36) |
| Phobia disorders                         | 6*                                                                             | (3, 8)      | 134                                                                                                              | (-6, 273)    | 110*                                                                                    | (36, 184)   |
| Attention deficit hyperactivity disorder | 3*                                                                             | (1, 5)      | -85                                                                                                              | (-209, 39)   | -19                                                                                     | (-81, 43)   |
| Other child behavioral health disorders  | 5*                                                                             | (3, 7)      | -50                                                                                                              | (-171, 71)   | 10                                                                                      | (-52, 71)   |
| Pervasive developmental disorder         | 8*                                                                             | (5, 10)     | 597*                                                                                                             | (380, 814)   | 377*                                                                                    | (257, 497)  |
| Bipolar disorder                         | 2*                                                                             | (1, 3)      | 26                                                                                                               | (-36, 87)    | 26                                                                                      | (-4, 57)    |
| Depression                               | 4*                                                                             | (3, 4)      | 115*                                                                                                             | (61, 168)    | 80*                                                                                     | (54, 106)   |
| Personality disorder                     | 1                                                                              | (-2, 4)     | 251*                                                                                                             | (25, 477)    | 124                                                                                     | (13, 235)   |
| Schizophrenia                            | -9*                                                                            | (-11, -7)   | -102*                                                                                                            | (-201, -4)   | -110*                                                                                   | (-150, -69) |
| Alcohol use disorder                     | 0.2                                                                            | (-1, 2)     | 814*                                                                                                             | (658, 971)   | 383*                                                                                    | (306, 459)  |
| Drug use disorder                        | 6*                                                                             | (5, 8)      | 1763*                                                                                                            | (1539, 1988) | 944*                                                                                    | (824, 1265) |
| Other behavioral health disorders        | 3*                                                                             | (2, 4)      | 188*                                                                                                             | (117, 259)   | 112*                                                                                    | (76, 148)   |

SES: Socioeconomic status; ref: Reference group

\*P<0.05

a: All models also controlled for subscriber employer characteristics (size, industry, region, etc.), unknown income and net worth < \$150K and unknown income and net worth >= 150K, and calendar year. Regressions used a two-part model for total family-year balance billing and marginal effects were generated using the margins command in STATA.

b: Part 1 of the two-part model used logistic regression to determine the probability of having any balance billing.

c: Part 2 of the two-part model used a gamma regression to determine the average difference in the level of balance billing among SES sample family-years with any balance billing.

d: The combined parts 1 and 2 report the average difference in the level of balance billing among all family-years in the SES sample, unconditional on whether or not they had any balance billing.

Web Appendix Table 7. Differences in balance billing by member in family-year, by subscriber and family characteristics, using trimmed balance billing values (n=66,648)

|                                                                                              | Balance billing by member in family-year <sup>a,b</sup> |              |
|----------------------------------------------------------------------------------------------|---------------------------------------------------------|--------------|
|                                                                                              | Marginal effect (\$)                                    | 95% CI       |
| <b>Plan characteristics</b>                                                                  |                                                         |              |
| Carve-out status (versus Carve-in)                                                           | 235*                                                    | (173, 297)   |
| HMO (versus non-HMO)                                                                         | 70*                                                     | (45, 95)     |
| <b>Provider supply</b>                                                                       |                                                         |              |
| Short-term hospital beds per 10K people                                                      | 2                                                       | (-0.6, 4)    |
| Psychiatric hospitals per 10K people                                                         | 3                                                       | (-664, 669)  |
| In-network behavioral health providers (MD, PhD, MSW, RN) per 10K people                     | -2*                                                     | (-3, -1)     |
| <b>Subscriber highest level of educational attainment (ref= Bachelor's degree or higher)</b> |                                                         |              |
| High school or lower                                                                         | -68*                                                    | (-87, -49)   |
| Some college                                                                                 | -59*                                                    | (-74, -44)   |
| Associates degree                                                                            | -51*                                                    | (-69, -34)   |
| <b>Subscriber income and net worth (ref= Income: &lt;75K &amp; net worth: &lt;= 25K)</b>     |                                                         |              |
| Income: <75K & net worth: 25K-100K                                                           | -9                                                      | (-39, 20)    |
| Income: < 75K & net worth: >=100K                                                            | -2                                                      | (-29, 26)    |
| Income: 75K-150K & net worth: <100K                                                          | -3                                                      | (-31, 25)    |
| Income: 75K-150K & net worth: 100K-250K                                                      | -3                                                      | (-30, 23)    |
| Income: 75K-150K & net worth: >250K                                                          | -7                                                      | (-32, 18)    |
| Income: >150K & net worth: < 500K                                                            | -3                                                      | (-29, 23)    |
| Income: >150K & net worth: >= 500K                                                           | 9                                                       | (-17, 35)    |
| <b>Subscriber race-ethnicity and language (ref=white, any language)</b>                      |                                                         |              |
| Asian, English                                                                               | 25                                                      | (-19, 70)    |
| Asian, other language                                                                        | 23                                                      | (-29, 75)    |
| Black, any language                                                                          | -13                                                     | (-36, 9)     |
| Hispanic, English                                                                            | 4                                                       | (-25, 33)    |
| Hispanic, other language                                                                     | 36                                                      | (-1, 72)     |
| Other, any language                                                                          | 11                                                      | (-13, 36)    |
| <b>Subscriber age (ref=45-54 years old)</b>                                                  |                                                         |              |
| 18-24                                                                                        | -68*                                                    | (-111, -25)  |
| 25-34                                                                                        | -16                                                     | (-34, 2)     |
| 35-44                                                                                        | -3                                                      | (-18, 11)    |
| 55-64                                                                                        | 6                                                       | (-10, 22)    |
| 65+                                                                                          | -7                                                      | (-44, 30)    |
| <b>Subscriber relationship (ref=single)</b>                                                  |                                                         |              |
| Domestic partner, different gender                                                           | -105*                                                   | (-143, -68)  |
| Domestic partner, same gender                                                                | -71*                                                    | (-126, -16)  |
| Spouse, different gender                                                                     | -103*                                                   | (-118, -88)  |
| Spouse, same gender                                                                          | -168*                                                   | (-213, -123) |
| <b>Number of dependents (ref=0)</b>                                                          |                                                         |              |
| 1                                                                                            | -55*                                                    | (-67, -44)   |
| 2                                                                                            | -42*                                                    | (-51, -33)   |

|                                          | Balance billing by member in family-year <sup>a,b</sup> |            |
|------------------------------------------|---------------------------------------------------------|------------|
|                                          | Marginal effect (\$)                                    | 95% CI     |
| 3                                        | -54*                                                    | (-62, -46) |
| 4+                                       | -57*                                                    | (-66, -49) |
| <b>Diagnosis-type/s in family</b>        |                                                         |            |
| Adjustment disorder                      | 19*                                                     | (8, 31)    |
| PTSD                                     | 46*                                                     | (18, 74)   |
| Generalized anxiety disorder             | 44*                                                     | (32, 55)   |
| Obsessive compulsive disorder            | 55*                                                     | (22, 88)   |
| Panic disorder                           | -36*                                                    | (-56, -17) |
| Phobia disorders                         | 53*                                                     | (19, 87)   |
| Attention deficit hyperactivity disorder | -8                                                      | (-36, 20)  |
| Other child behavioral health disorders  | -3                                                      | (-30, 24)  |
| Pervasive developmental disorder         | 167*                                                    | (112, 221) |
| Bipolar disorder                         | 14*                                                     | (0.4, 28)  |
| Depression                               | 37*                                                     | (26, 49)   |
| Personality disorder                     | 69*                                                     | (16, 122)  |
| Schizophrenia                            | -51*                                                    | (-69, -33) |
| Alcohol use disorder                     | 174*                                                    | (139, 209) |
| Drug use disorder                        | 417*                                                    | (362, 472) |
| Other behavioral health disorders        | 50*                                                     | (33, 66)   |

\*P<0.05

1: All models also control for subscriber employer characteristics (size, industry, region, etc.) whether or not plans are an HMO, unknown income and net worth < \$150K and unknown income and net worth >= 150K, and calendar years. Marginal effects are generated using the margins command in STATA.

2: Models used a two-part model for total family-year balance billing. Part 1 of the two-part model uses logit to determine the probability of having any balance billing. Part 2 of the two-part model uses a gamma regression to determine the average change in balance-billing level among those with any balance billing. The results reported here combined parts 1 and 2 to report the change in balance-billing level among the full sample, unconditional on whether they had any balance billing.

Web Appendix Table 8. Differences in adjusted balance billing by subscriber and family characteristics, sensitivity analysis controlling for whether diagnoses occurred alone or together with other behavioral health diagnoses, using trimmed balance billing values (n=66,648)

|                                                                                              | Total family-year balance billing <sup>a,b</sup> |               |
|----------------------------------------------------------------------------------------------|--------------------------------------------------|---------------|
|                                                                                              | Marginal effect (\$)                             | 95% CI        |
| <b>Plan characteristics</b>                                                                  |                                                  |               |
| Carve-out status (versus Carve-in)                                                           | 371*                                             | (310, 433)    |
| HMO (versus non-HMO)                                                                         | 147*                                             | (95, 199)     |
| <b>Provider supply</b>                                                                       |                                                  |               |
| Short-term hospital beds per 10K people                                                      | 4                                                | (-0.3, 8)     |
| Psychiatric hospitals per 10K people                                                         | -10                                              | (-1398, 1378) |
| In-network behavioral health providers (MD, PhD, MSW, RN) per 10K people                     | -5*                                              | (-111, -20)   |
| <b>Subscriber highest level of educational attainment (ref= Bachelor's degree or higher)</b> |                                                  |               |
| High school or lower                                                                         | -147*                                            | (-190, -105)  |
| Some college                                                                                 | -126*                                            | (-156, -96)   |
| Associates degree                                                                            | -107*                                            | (-144, -70)   |
| <b>Subscriber income and net worth (ref= Income: &lt;75K &amp; net worth: &lt;= 25K)</b>     |                                                  |               |
| Income: <75K & net worth: 25K-100K                                                           | -0.5                                             | (-64, 63)     |
| Income: < 75K & net worth: >=100K                                                            | 13                                               | (-45, 70)     |
| Income: 75K-150K & net worth: <100K                                                          | 33                                               | (-27, 93)     |
| Income: 75K-150K & net worth: 100K-250K                                                      | 16                                               | (-40, 72)     |
| Income: 75K-150K & net worth: >250K                                                          | 10                                               | (-42, 62)     |
| Income: >150K & net worth: < 500K                                                            | 26                                               | (-29, 81)     |
| Income: >150K & net worth: >= 500K                                                           | 54                                               | (-0.2, 108)   |
| <b>Subscriber race-ethnicity and language (ref=white, any language)</b>                      |                                                  |               |
| Asian, English                                                                               | 59                                               | (-23, 141)    |
| Asian, other language                                                                        | 44                                               | (-53, 141)    |
| Black, any language                                                                          | -21                                              | (-73, 31)     |
| Hispanic, English                                                                            | 16                                               | (-43, 75)     |
| Hispanic, other language                                                                     | 76*                                              | (12, 141)     |
| Other, any language                                                                          | 24                                               | (-24, 73)     |
| <b>Subscriber age (ref=45-54 years old)</b>                                                  |                                                  |               |
| 18-24                                                                                        | -233*                                            | (-373, -94)   |
| 25-34                                                                                        | -65*                                             | (-104, -26)   |
| 35-44                                                                                        | -15                                              | (-44, 14)     |
| 55-64                                                                                        | -0.2                                             | (-32, 32)     |
| 65+                                                                                          | -20                                              | (-98, 57)     |
| <b>Subscriber relationship (ref=single)</b>                                                  |                                                  |               |
| Domestic partner, different gender                                                           | -16                                              | (-116, 85)    |
| Domestic partner, same gender                                                                | 40                                               | (-79, 160)    |
| Spouse, different gender                                                                     | -17                                              | (-43, 9)      |
| Spouse, same gender                                                                          | -274*                                            | (-514, -34)   |
| <b>Number of dependents (ref=0)</b>                                                          |                                                  |               |
| 1                                                                                            | 0.5                                              | (-22, 24)     |
| 2                                                                                            | 18                                               | (0.03, 35)    |
| 3                                                                                            | -10                                              | (-25, 5)      |

|                                                                           | Total family-year balance billing <sup>a,b</sup> |             |
|---------------------------------------------------------------------------|--------------------------------------------------|-------------|
|                                                                           | Marginal effect (\$)                             | 95% CI      |
| 4+                                                                        | -19*                                             | (-36, -3)   |
| <b>Diagnosis</b>                                                          |                                                  |             |
| Adjustment disorder only                                                  | -66*                                             | (-111, -20) |
| Adjustment disorder and at least one other diagnosis                      | 63*                                              | (34, 92)    |
| PTSD only                                                                 | -130                                             | (-506, 246) |
| PTSD and at least one other diagnosis                                     | 57*                                              | (8, 106)    |
| Generalized anxiety disorder only                                         | 1                                                | (-51, 53)   |
| Generalized anxiety disorder and at least one other diagnosis             | 86*                                              | (58, 113)   |
| Obsessive compulsive disorder only                                        | -23                                              | (-168, 122) |
| Obsessive compulsive disorder and at least one other diagnosis            | 107*                                             | (50, 165)   |
| Panic disorder only                                                       | -99*                                             | (-149, -49) |
| Panic disorder and at least one other diagnosis                           | -                                                | -           |
| Phobia disorders only                                                     | -48                                              | (-264, 168) |
| Phobia disorders and at least one other diagnosis                         | 88*                                              | (30, 145)   |
| Attention deficit hyperactivity disorder only                             | -                                                | -           |
| Attention deficit hyperactivity disorder and at least one other diagnosis | -55                                              | (-121, 12)  |
| Other child behavioral health disorders only                              | -206*                                            | (-330, -82) |
| Other child behavioral health disorders and at least one other diagnosis  | 20                                               | (-45, 84)   |
| Pervasive developmental disorder only                                     | 284*                                             | (155, 414)  |
| Pervasive developmental disorder and at least one other diagnosis         | 211*                                             | (146, 276)  |
| Bipolar disorder only                                                     | -129*                                            | (-227, -32) |
| Bipolar disorder and at least one other diagnosis                         | 24                                               | (-7, 54)    |
| Depression only                                                           | -0.1                                             | (-53, 53)   |
| Depression and at least one other diagnosis                               | 53*                                              | (23, 84)    |
| Personality disorder only                                                 | 84                                               | (-447, 615) |
| Personality disorder and at least one other diagnosis                     | 93*                                              | (13, 174)   |
| Schizophrenia only                                                        | -215*                                            | (-401, -28) |
| Schizophrenia and at least one other diagnosis                            | -118*                                            | (-170, -67) |
| Alcohol use disorder only                                                 | 668*                                             | (532, 805)  |
| Alcohol use disorder and at least one other diagnosis                     | 232                                              | (181, 283)  |
| Drug use disorder only                                                    | 891*                                             | (764, 1018) |
| Drug use disorder and at least one other diagnosis                        | 523*                                             | (466, 579)  |
| Other behavioral health disorders only                                    | -113*                                            | (-198, -28) |
| Other behavioral health disorders and at least one other diagnosis        | 123*                                             | (91, 155)   |

a: All models also control for subscriber employer characteristics (size, industry, region, etc.), unknown income and net worth < \$150K and unknown income and net worth >= 150K and calendar years. Marginal effects are generated using the margins command in STATA.

b: Models used a two-part model for total family-year balance billing. Part 1 of the two-part model uses logit to determine the probability of having any balance billing. Part 2 of the two-part model uses a gamma regression to determine the average change in balance-billing level among those with any balance billing. The results reported here combined parts 1 and 2 to report the change in balance-billing level among the full sample, unconditional on whether they had any balance billing.
